# Supplementary material
Source: MDPI journal article supplement (https://www.mdpi.com/2304-6740/11/5/209)
Supplement: s1 [file s1]

# Chalcogen Bonds, Halogen Bonds and Halogen...Halogen Contacts in Di- and Tri-iododiorganyltellurium(IV) Derivatives

Sergi Burguera, Rosa M. Gomila, Antonio Bauzá and Antonio Frontera \*

Departament de Química, Universitat de les Illes Balears, Crta de Valldemossa  
km 7.5, 07122 Palma de Mallorca, Balears, Spain; sergi.burguera@uib.es (S.B.);  
rosa.gomila@uib.es (R.M.G.); antonio.bauza@uib.es (A.B.)

\* Correspondence: toni.frontera@uib.es

## Table of contents:

|                                                        |           |
|--------------------------------------------------------|-----------|
| Cartesian coordinates of the calculated CSD assemblies | Pages 2–6 |
| Cartesian coordinates for the MEP surface calculations | Pages 7–8 |

## Cartesian coordinates of the calculated CSD assemblies

BZTELI10.

|    |             |             |             |
|----|-------------|-------------|-------------|
| C  | -0.20880000 | 1.23340000  | 2.61850000  |
| C  | 2.07200000  | 4.91420000  | 0.11200000  |
| C  | 2.07680000  | 4.47580000  | 1.43410000  |
| C  | 1.29050000  | 3.38460000  | 1.73300000  |
| C  | -0.91190000 | 0.19810000  | 3.18890000  |
| C  | -1.80320000 | -0.49460000 | 2.36990000  |
| C  | -1.97890000 | -0.13390000 | 1.05920000  |
| C  | -1.26590000 | 0.90690000  | 0.49540000  |
| C  | -0.34700000 | 1.61950000  | 1.26990000  |
| C  | 0.47940000  | 2.74120000  | 0.80390000  |
| C  | 0.49250000  | 3.22520000  | -0.50870000 |
| C  | 1.28460000  | 4.28440000  | -0.83900000 |
| H  | 2.49780000  | 5.79130000  | -0.10440000 |
| H  | 2.66640000  | 4.79810000  | 2.11650000  |
| H  | -0.85610000 | 0.02290000  | 4.08110000  |
| H  | -2.24940000 | -1.55400000 | 2.70490000  |
| H  | -2.65560000 | -0.68880000 | 0.40810000  |
| H  | -1.38620000 | 1.24190000  | -0.37960000 |
| H  | -0.16490000 | 2.72330000  | -1.11990000 |
| H  | 1.37440000  | 4.45910000  | -1.79380000 |
| I  | -1.01600000 | 4.26710000  | 4.36670000  |
| I  | 3.36650000  | 0.67870000  | 2.82000000  |
| Te | 1.18500000  | 2.45620000  | 3.62850000  |
| C  | 4.74900000  | -0.19780000 | 6.87230000  |
| C  | 2.46820000  | -3.87860000 | 9.37880000  |
| C  | 2.46340000  | -3.44020000 | 8.05680000  |
| C  | 3.24970000  | -2.34890000 | 7.75780000  |
| C  | 5.45210000  | 0.83750000  | 6.30190000  |
| C  | 6.34340000  | 1.53030000  | 7.12100000  |
| C  | 6.51920000  | 1.16950000  | 8.43170000  |
| C  | 5.80610000  | 0.12870000  | 8.99540000  |
| C  | 4.88720000  | -0.58390000 | 8.22100000  |
| C  | 4.06080000  | -1.70550000 | 8.68700000  |
| C  | 4.04770000  | -2.18960000 | 9.99950000  |
| C  | 3.25560000  | -3.24870000 | 10.32980000 |
| H  | 2.04240000  | -4.75560000 | 9.59520000  |
| H  | 1.87380000  | -3.76250000 | 7.37440000  |
| H  | 5.39630000  | 1.01280000  | 5.40980000  |
| H  | 6.78960000  | 2.58970000  | 6.78590000  |
| H  | 7.19580000  | 1.72440000  | 9.08270000  |
| H  | 5.92640000  | -0.20620000 | 9.87050000  |
| H  | 4.70510000  | -1.68770000 | 10.61080000 |
| H  | 3.16580000  | -3.42350000 | 11.28460000 |
| I  | 5.55620000  | -3.23150000 | 5.12410000  |
| I  | 1.17370000  | 0.35700000  | 6.67080000  |
| Te | 3.35520000  | -1.42060000 | 5.86230000  |
| C  | 2.90150000  | 7.77290000  | 6.87230000  |
| C  | 0.62070000  | 4.09210000  | 9.37880000  |
| C  | 0.61590000  | 4.53050000  | 8.05680000  |
| C  | 1.40220000  | 5.62180000  | 7.75780000  |
| C  | 3.60460000  | 8.80820000  | 6.30190000  |
| C  | 4.49590000  | 9.50090000  | 7.12100000  |
| C  | 4.67160000  | 9.14020000  | 8.43170000  |
| C  | 3.95860000  | 8.09940000  | 8.99540000  |
| C  | 3.03970000  | 7.38680000  | 8.22100000  |
| C  | 2.21330000  | 6.26520000  | 8.68700000  |
| C  | 2.20020000  | 5.78110000  | 9.99950000  |
| C  | 1.40810000  | 4.72200000  | 10.32980000 |
| H  | 0.19490000  | 3.21500000  | 9.59520000  |
| H  | 0.02630000  | 4.20820000  | 7.37440000  |
| H  | 3.54880000  | 8.98340000  | 5.40980000  |
| H  | 4.94210000  | 10.56040000 | 6.78590000  |
| H  | 5.34830000  | 9.69510000  | 9.08270000  |
| H  | 4.07890000  | 7.76450000  | 9.87050000  |
| H  | 2.85760000  | 6.28300000  | 10.61080000 |
| H  | 1.31830000  | 4.54720000  | 11.28460000 |
| I  | 3.70870000  | 4.73920000  | 5.12410000  |

|                                   |             |             |              |
|-----------------------------------|-------------|-------------|--------------|
| I                                 | -0.67380000 | 8.32760000  | 6.67080000   |
| Te                                | 1.50770000  | 6.55010000  | 5.86230000   |
| <b>DIDMTE01.</b>                  |             |             |              |
| Te                                | 3.24650000  | 8.89270000  | 1.87510000   |
| I                                 | 1.54770000  | 8.99660000  | -0.49270000  |
| C                                 | 4.55310000  | 10.30140000 | 0.94950000   |
| H                                 | 4.06400000  | 10.79460000 | 0.25880000   |
| H                                 | 5.30690000  | 9.82800000  | 0.54080000   |
| H                                 | 4.88800000  | 10.92860000 | 1.62380000   |
| I                                 | 4.94530000  | 8.99660000  | 4.24280000   |
| C                                 | 1.93980000  | 10.30140000 | 2.80060000   |
| H                                 | 2.42890000  | 10.79460000 | 3.49140000   |
| H                                 | 1.18600000  | 9.82800000  | 3.20940000   |
| H                                 | 1.60500000  | 10.92860000 | 2.12630000   |
| Te                                | 2.71940000  | 6.33030000  | 5.62520000   |
| I                                 | 4.41820000  | 6.22640000  | 7.99300000   |
| C                                 | 1.41280000  | 4.92160000  | 6.55080000   |
| H                                 | 1.90190000  | 4.42840000  | 7.24150000   |
| H                                 | 0.65900000  | 5.39500000  | 6.95950000   |
| H                                 | 1.07790000  | 4.29440000  | 5.87650000   |
| I                                 | 1.02060000  | 6.22640000  | 3.25750000   |
| C                                 | 4.02610000  | 4.92160000  | 4.69970000   |
| H                                 | 3.53700000  | 4.42840000  | 4.00890000   |
| H                                 | 4.77990000  | 5.39500000  | 4.29090000   |
| H                                 | 4.36090000  | 4.29440000  | 5.37400000   |
| Te                                | 3.77350000  | 6.33030000  | -1.87510000  |
| I                                 | 5.47230000  | 6.22640000  | 0.49270000   |
| C                                 | 2.46690000  | 4.92160000  | -0.94950000  |
| H                                 | 2.95600000  | 4.42840000  | -0.25880000  |
| H                                 | 1.71310000  | 5.39500000  | -0.54080000  |
| H                                 | 2.13200000  | 4.29440000  | -1.62380000  |
| I                                 | 2.07470000  | 6.22640000  | -4.24280000  |
| C                                 | 5.08020000  | 4.92160000  | -2.80060000  |
| H                                 | 4.59110000  | 4.42840000  | -3.49140000  |
| H                                 | 5.83400000  | 5.39500000  | -3.20940000  |
| H                                 | 5.41500000  | 4.29440000  | -2.12630000  |
| <b>DIDMTE01_B (Dimeric form).</b> |             |             |              |
| Te                                | 3.77350000  | 6.33030000  | -1.87510000  |
| I                                 | 5.47230000  | 6.22640000  | 0.49270000   |
| C                                 | 2.46690000  | 4.92160000  | -0.94950000  |
| H                                 | 2.95600000  | 4.42840000  | -0.25880000  |
| H                                 | 1.71310000  | 5.39500000  | -0.54080000  |
| H                                 | 2.13200000  | 4.29440000  | -1.62380000  |
| I                                 | 2.07470000  | 6.22640000  | -4.24280000  |
| C                                 | 5.08020000  | 4.92160000  | -2.80060000  |
| H                                 | 4.59110000  | 4.42840000  | -3.49140000  |
| H                                 | 5.83400000  | 5.39500000  | -3.20940000  |
| H                                 | 5.41500000  | 4.29440000  | -2.12630000  |
| Te                                | -2.19240000 | 6.33030000  | -9.37540000  |
| I                                 | -0.49360000 | 6.22640000  | -7.00760000  |
| C                                 | -3.49900000 | 4.92160000  | -8.44980000  |
| H                                 | -3.00990000 | 4.42840000  | -7.75910000  |
| H                                 | -4.25280000 | 5.39500000  | -8.04110000  |
| H                                 | -3.83390000 | 4.29440000  | -9.12410000  |
| I                                 | -3.89120000 | 6.22640000  | -11.74310000 |
| C                                 | -0.88580000 | 4.92160000  | -10.30090000 |
| H                                 | -1.37480000 | 4.42840000  | -10.99170000 |
| H                                 | -0.13190000 | 5.39500000  | -10.70970000 |
| H                                 | -0.55090000 | 4.29440000  | -9.62660000  |
| <b>OPAXEJ.</b>                    |             |             |              |
| Te                                | 2.39150000  | 2.36340000  | 2.06950000   |
| I                                 | 0.13010000  | 1.53930000  | 3.75220000   |
| I                                 | 4.66570000  | 3.03180000  | 0.40470000   |
| C                                 | 2.02990000  | 0.65100000  | 0.80930000   |
| H                                 | 2.87000000  | 0.19210000  | 0.65310000   |
| H                                 | 1.44030000  | 0.03720000  | 1.27470000   |
| C                                 | 1.40820000  | 1.00970000  | -0.53150000  |
| H                                 | 1.32250000  | 0.21710000  | -1.06700000  |
| H                                 | 1.96960000  | 1.64280000  | -0.98480000  |
| H                                 | 0.54100000  | 1.39490000  | -0.38890000  |
| C                                 | 3.67300000  | 1.18750000  | 3.35390000   |

|    |             |            |             |
|----|-------------|------------|-------------|
| H  | 3.29980000  | 0.29500000 | 3.42880000  |
| H  | 4.54260000  | 1.10510000 | 2.93030000  |
| C  | 3.86620000  | 1.74310000 | 4.73730000  |
| H  | 4.47020000  | 1.17970000 | 5.22690000  |
| H  | 3.02060000  | 1.77500000 | 5.18990000  |
| H  | 4.23170000  | 2.62840000 | 4.67850000  |
| Te | 10.35470000 | 5.54300000 | -2.06950000 |
| I  | 12.61620000 | 6.36720000 | -3.75220000 |
| I  | 8.08050000  | 4.87470000 | -0.40470000 |
| C  | 10.71630000 | 7.25550000 | -0.80930000 |
| H  | 9.87620000  | 7.71440000 | -0.65310000 |
| H  | 11.30590000 | 7.86930000 | -1.27470000 |
| C  | 11.33810000 | 6.89680000 | 0.53150000  |
| H  | 11.42370000 | 7.68930000 | 1.06700000  |
| H  | 10.77660000 | 6.26370000 | 0.98480000  |
| H  | 12.20530000 | 6.51160000 | 0.38890000  |
| C  | 9.07320000  | 6.71890000 | -3.35390000 |
| H  | 9.44650000  | 7.61150000 | -3.42880000 |
| H  | 8.20360000  | 6.80130000 | -2.93030000 |
| C  | 8.88000000  | 6.16340000 | -4.73730000 |
| H  | 8.27600000  | 6.72670000 | -5.22690000 |
| H  | 9.72570000  | 6.13150000 | -5.18990000 |
| H  | 8.51460000  | 5.27810000 | -4.67850000 |

**OPUXEF.**

|    |            |             |             |
|----|------------|-------------|-------------|
| Te | 6.08100000 | 1.93170000  | 17.10450000 |
| I  | 8.52660000 | 3.03780000  | 16.67720000 |
| I  | 7.10720000 | -0.32310000 | 18.17840000 |
| I  | 3.47280000 | 0.81110000  | 17.52130000 |
| O  | 5.11760000 | 3.45000000  | 14.98780000 |
| C  | 5.97500000 | 1.29180000  | 15.02090000 |
| H  | 5.09480000 | 0.88350000  | 14.88260000 |
| C  | 7.01380000 | 0.32190000  | 14.49030000 |
| H  | 6.97140000 | -0.51590000 | 14.97730000 |
| H  | 7.90360000 | 0.69360000  | 14.59400000 |
| C  | 6.70650000 | 0.09370000  | 13.02000000 |
| H  | 5.86120000 | -0.37650000 | 12.94490000 |
| H  | 7.39450000 | -0.47350000 | 12.63820000 |
| C  | 6.62720000 | 1.38310000  | 12.21280000 |
| H  | 7.49970000 | 1.80450000  | 12.19320000 |
| H  | 6.37200000 | 1.17690000  | 11.30030000 |
| C  | 5.61520000 | 2.34810000  | 12.81260000 |
| H  | 5.62140000 | 3.18430000  | 12.32250000 |
| H  | 4.72300000 | 1.96990000  | 12.76150000 |
| C  | 5.99610000 | 2.58850000  | 14.25720000 |
| H  | 6.90330000 | 2.96020000  | 14.28880000 |
| C  | 5.18620000 | 4.83960000  | 14.61950000 |
| H  | 4.72970000 | 4.98880000  | 13.77770000 |
| H  | 6.11140000 | 5.11680000  | 14.52330000 |
| C  | 4.51600000 | 5.61960000  | 15.72750000 |
| H  | 3.62650000 | 5.28300000  | 15.86280000 |
| H  | 4.47270000 | 6.54710000  | 15.48390000 |
| H  | 5.02060000 | 5.52430000  | 16.53770000 |
| Te | 4.53490000 | -2.14340000 | 20.47790000 |
| I  | 2.08930000 | -1.03740000 | 20.90510000 |
| I  | 3.50870000 | -4.39820000 | 19.40390000 |
| I  | 7.14310000 | -3.26400000 | 20.06100000 |
| O  | 5.49830000 | -0.62510000 | 22.59450000 |
| C  | 4.64090000 | -2.78330000 | 22.56140000 |
| H  | 5.52110000 | -3.19170000 | 22.69970000 |
| C  | 3.60210000 | -3.75320000 | 23.09210000 |
| H  | 3.64450000 | -4.59110000 | 22.60500000 |
| H  | 2.71230000 | -3.38160000 | 22.98840000 |
| C  | 3.90940000 | -3.98140000 | 24.56230000 |
| H  | 4.75470000 | -4.45170000 | 24.63750000 |
| H  | 3.22140000 | -4.54870000 | 24.94420000 |
| C  | 3.98870000 | -2.69200000 | 25.36960000 |
| H  | 3.11620000 | -2.27070000 | 25.38910000 |
| H  | 4.24390000 | -2.89820000 | 26.28210000 |
| C  | 5.00070000 | -1.72700000 | 24.76980000 |
| H  | 4.99450000 | -0.89080000 | 25.25980000 |

|                  |             |             |             |
|------------------|-------------|-------------|-------------|
| H                | 5.89290000  | -2.10520000 | 24.82090000 |
| C                | 4.61970000  | -1.48660000 | 23.32510000 |
| H                | 3.71260000  | -1.11500000 | 23.29350000 |
| C                | 5.42970000  | 0.76450000  | 22.96280000 |
| H                | 5.88620000  | 0.91360000  | 23.80470000 |
| H                | 4.50450000  | 1.04160000  | 23.05900000 |
| C                | 6.09990000  | 1.54450000  | 21.85490000 |
| H                | 6.98940000  | 1.20790000  | 21.71960000 |
| H                | 6.14320000  | 2.47200000  | 22.09840000 |
| H                | 5.59530000  | 1.44910000  | 21.04460000 |
| <b>ОТЕHEX.</b>   |             |             |             |
| C                | 2.58120000  | 2.46450000  | 3.04130000  |
| C                | 3.83120000  | 2.15430000  | 2.23930000  |
| C                | 3.03900000  | 1.39290000  | 0.13460000  |
| C                | 1.52860000  | 1.46460000  | 0.23010000  |
| H                | 2.36730000  | 1.81780000  | 3.70070000  |
| H                | 2.56200000  | 3.42840000  | 3.55270000  |
| H                | 4.51170000  | 1.84970000  | 3.14900000  |
| H                | 3.97730000  | 2.81450000  | 1.85710000  |
| H                | 3.06570000  | 0.59800000  | -0.44410000 |
| H                | 3.32290000  | 2.03310000  | -0.14800000 |
| H                | 1.16460000  | 1.61850000  | -0.71320000 |
| H                | 1.15840000  | 0.63780000  | 0.26910000  |
| I                | -0.51240000 | 0.57210000  | 3.08980000  |
| I                | 2.07630000  | 5.08960000  | 0.48380000  |
| O                | 3.67690000  | 1.06280000  | 1.35240000  |
| Te               | 0.83140000  | 2.76990000  | 1.78790000  |
| C                | -5.07690000 | -1.52200000 | 3.68730000  |
| C                | -6.32680000 | -1.83220000 | 4.48930000  |
| C                | -5.53460000 | -2.59360000 | 6.59400000  |
| C                | -4.02420000 | -2.52190000 | 6.49850000  |
| H                | -4.86290000 | -2.16870000 | 3.02790000  |
| H                | -5.05760000 | -0.55810000 | 3.17590000  |
| H                | -7.00740000 | -2.13680000 | 3.57960000  |
| H                | -6.47290000 | -1.17200000 | 4.87150000  |
| H                | -5.56140000 | -3.38850000 | 7.17270000  |
| H                | -5.81860000 | -1.95340000 | 6.87660000  |
| H                | -3.66020000 | -2.36800000 | 7.44180000  |
| H                | -3.65410000 | -3.34870000 | 6.45940000  |
| I                | -1.98320000 | -3.41440000 | 3.63880000  |
| I                | -4.57190000 | 1.10310000  | 6.24480000  |
| O                | -6.17250000 | -2.92370000 | 5.37610000  |
| Te               | -3.32710000 | -1.21660000 | 4.94070000  |
| <b>PEBHEN01.</b> |             |             |             |
| Te               | 5.15810000  | 2.11270000  | 0.85770000  |
| I                | 3.55180000  | 4.14590000  | 0.06770000  |
| I                | 4.61190000  | 0.67250000  | -1.63510000 |
| I                | 5.86030000  | 3.37660000  | 3.35400000  |
| Cl               | 7.54330000  | 0.28240000  | 0.94350000  |
| C                | 7.21400000  | 4.09610000  | -0.44240000 |
| C                | 6.58910000  | 4.52600000  | -1.63650000 |
| H                | 6.08490000  | 3.92440000  | -2.13590000 |
| C                | 8.01650000  | 1.75320000  | 0.12150000  |
| C                | 9.36310000  | 1.77880000  | -0.37960000 |
| C                | 7.06430000  | 2.71560000  | 0.01930000  |
| C                | 7.93730000  | 5.01510000  | 0.31510000  |
| H                | 8.33650000  | 4.75410000  | 1.11300000  |
| C                | 8.05620000  | 6.32650000  | -0.13320000 |
| H                | 8.55600000  | 6.93360000  | 0.36270000  |
| C                | 6.72550000  | 5.83150000  | -2.06720000 |
| H                | 6.33570000  | 6.10320000  | -2.86700000 |
| C                | 7.45110000  | 6.74060000  | -1.29380000 |
| H                | 7.52450000  | 7.62700000  | -1.56540000 |
| C                | 9.70220000  | 2.53020000  | -1.49990000 |
| H                | 9.05290000  | 3.05690000  | -1.90680000 |
| C                | 10.38000000 | 1.00580000  | 0.21620000  |
| H                | 10.18720000 | 0.49520000  | 0.96820000  |
| C                | 10.99990000 | 2.50850000  | -2.02860000 |
| H                | 11.19420000 | 3.00350000  | -2.79230000 |
| C                | 11.98580000 | 1.76500000  | -1.42870000 |
| H                | 12.85420000 | 1.76980000  | -1.76180000 |

|    |             |             |             |
|----|-------------|-------------|-------------|
| C  | 11.65310000 | 0.99790000  | -0.30170000 |
| H  | 12.30650000 | 0.47610000  | 0.10610000  |
| Te | 6.05020000  | -2.11270000 | -3.33190000 |
| I  | 4.44390000  | -4.14590000 | -4.12190000 |
| I  | 5.50390000  | -0.67250000 | -5.82480000 |
| I  | 6.75240000  | -3.37660000 | -0.83570000 |
| Cl | 8.43530000  | -0.28240000 | -3.24610000 |
| C  | 8.10600000  | -4.09610000 | -4.63210000 |
| C  | 7.48120000  | -4.52600000 | -5.82610000 |
| H  | 6.97690000  | -3.92440000 | -6.32550000 |
| C  | 8.90860000  | -1.75320000 | -4.06810000 |
| C  | 10.25520000 | -1.77880000 | -4.56920000 |
| C  | 7.95630000  | -2.71560000 | -4.17040000 |
| C  | 8.82940000  | -5.01510000 | -3.87460000 |
| H  | 9.22850000  | -4.75410000 | -3.07670000 |
| C  | 8.94830000  | -6.32650000 | -4.32290000 |
| H  | 9.44800000  | -6.93360000 | -3.82700000 |
| C  | 7.61760000  | -5.83150000 | -6.25680000 |
| H  | 7.22780000  | -6.10320000 | -7.05660000 |
| C  | 8.34310000  | -6.74060000 | -5.48340000 |
| H  | 8.41660000  | -7.62700000 | -5.75510000 |
| C  | 10.59420000 | -2.53020000 | -5.68950000 |
| H  | 9.94500000  | -3.05690000 | -6.09650000 |
| C  | 11.27210000 | -1.00580000 | -3.97340000 |
| H  | 11.07930000 | -0.49520000 | -3.22150000 |
| C  | 11.89190000 | -2.50850000 | -6.21830000 |
| H  | 12.08620000 | -3.00350000 | -6.98190000 |
| C  | 12.87780000 | -1.76500000 | -5.61830000 |
| H  | 13.74620000 | -1.76980000 | -5.95150000 |
| C  | 12.54520000 | -0.99790000 | -4.49130000 |
| H  | 13.19860000 | -0.47610000 | -4.08350000 |

# Cartesian coordinates for the MEP surface calculations

## BZTELI10.

|    |             |             |             |
|----|-------------|-------------|-------------|
| C  | 2.90150000  | 7.77290000  | 6.87230000  |
| C  | 0.62070000  | 4.09210000  | 9.37880000  |
| C  | 0.61590000  | 4.53050000  | 8.05680000  |
| C  | 1.40220000  | 5.62180000  | 7.75780000  |
| C  | 3.60460000  | 8.80820000  | 6.30190000  |
| C  | 4.49590000  | 9.50090000  | 7.12100000  |
| C  | 4.67160000  | 9.14020000  | 8.43170000  |
| C  | 3.95860000  | 8.09940000  | 8.99540000  |
| C  | 3.03970000  | 7.38680000  | 8.22100000  |
| C  | 2.21330000  | 6.26520000  | 8.68700000  |
| C  | 2.20020000  | 5.78110000  | 9.99950000  |
| C  | 1.40810000  | 4.72200000  | 10.32980000 |
| H  | 0.19490000  | 3.21500000  | 9.59520000  |
| H  | 0.02630000  | 4.20820000  | 7.37440000  |
| H  | 3.54880000  | 8.98340000  | 5.40980000  |
| H  | 4.94210000  | 10.56040000 | 6.78590000  |
| H  | 5.34830000  | 9.69510000  | 9.08270000  |
| H  | 4.07890000  | 7.76450000  | 9.87050000  |
| H  | 2.85760000  | 6.28300000  | 10.61080000 |
| H  | 1.31830000  | 4.54720000  | 11.28460000 |
| I  | 3.70870000  | 4.73920000  | 5.12410000  |
| I  | -0.67380000 | 8.32760000  | 6.67080000  |
| Te | 1.50770000  | 6.55010000  | 5.86230000  |

## DIDMTE01.

|    |            |            |             |
|----|------------|------------|-------------|
| Te | 3.77350000 | 6.33030000 | -1.87510000 |
| I  | 5.47230000 | 6.22640000 | 0.49270000  |
| C  | 2.46690000 | 4.92160000 | -0.94950000 |
| H  | 2.95600000 | 4.42840000 | -0.25880000 |
| H  | 1.71310000 | 5.39500000 | -0.54080000 |
| H  | 2.13200000 | 4.29440000 | -1.62380000 |
| I  | 2.07470000 | 6.22640000 | -4.24280000 |
| C  | 5.08020000 | 4.92160000 | -2.80060000 |
| H  | 4.59110000 | 4.42840000 | -3.49140000 |
| H  | 5.83400000 | 5.39500000 | -3.20940000 |
| H  | 5.41500000 | 4.29440000 | -2.12630000 |

## OPAXEJ.

|    |             |            |             |
|----|-------------|------------|-------------|
| Te | 10.35470000 | 5.54300000 | -2.06950000 |
| I  | 12.61620000 | 6.36720000 | -3.75220000 |
| I  | 8.08050000  | 4.87470000 | -0.40470000 |
| C  | 10.71630000 | 7.25550000 | -0.80930000 |
| H  | 9.87620000  | 7.71440000 | -0.65310000 |
| H  | 11.30590000 | 7.86930000 | -1.27470000 |
| C  | 11.33810000 | 6.89680000 | 0.53150000  |
| H  | 11.42370000 | 7.68930000 | 1.06700000  |
| H  | 10.77660000 | 6.26370000 | 0.98480000  |
| H  | 12.20530000 | 6.51160000 | 0.38890000  |
| C  | 9.07320000  | 6.71890000 | -3.35390000 |
| H  | 9.44650000  | 7.61150000 | -3.42880000 |
| H  | 8.20360000  | 6.80130000 | -2.93030000 |
| C  | 8.88000000  | 6.16340000 | -4.73730000 |
| H  | 8.27600000  | 6.72670000 | -5.22690000 |
| H  | 9.72570000  | 6.13150000 | -5.18990000 |
| H  | 8.51460000  | 5.27810000 | -4.67850000 |

## OPUXEF.

|    |            |             |             |
|----|------------|-------------|-------------|
| Te | 4.53490000 | -2.14340000 | 20.47790000 |
| I  | 2.08930000 | -1.03740000 | 20.90510000 |
| I  | 3.50870000 | -4.39820000 | 19.40390000 |
| I  | 7.14310000 | -3.26400000 | 20.06100000 |
| O  | 5.49830000 | -0.62510000 | 22.59450000 |
| C  | 4.64090000 | -2.78330000 | 22.56140000 |
| H  | 5.52110000 | -3.19170000 | 22.69970000 |
| C  | 3.60210000 | -3.75320000 | 23.09210000 |
| H  | 3.64450000 | -4.59110000 | 22.60500000 |
| H  | 2.71230000 | -3.38160000 | 22.98840000 |
| C  | 3.90940000 | -3.98140000 | 24.56230000 |
| H  | 4.75470000 | -4.45170000 | 24.63750000 |
| H  | 3.22140000 | -4.54870000 | 24.94420000 |
| C  | 3.98870000 | -2.69200000 | 25.36960000 |

|           |             |             |             |
|-----------|-------------|-------------|-------------|
| H         | 3.11620000  | -2.27070000 | 25.38910000 |
| H         | 4.24390000  | -2.89820000 | 26.28210000 |
| C         | 5.00070000  | -1.72700000 | 24.76980000 |
| H         | 4.99450000  | -0.89080000 | 25.25980000 |
| H         | 5.89290000  | -2.10520000 | 24.82090000 |
| C         | 4.61970000  | -1.48660000 | 23.32510000 |
| H         | 3.71260000  | -1.11500000 | 23.29350000 |
| C         | 5.42970000  | 0.76450000  | 22.96280000 |
| H         | 5.88620000  | 0.91360000  | 23.80470000 |
| H         | 4.50450000  | 1.04160000  | 23.05900000 |
| C         | 6.09990000  | 1.54450000  | 21.85490000 |
| H         | 6.98940000  | 1.20790000  | 21.71960000 |
| H         | 6.14320000  | 2.47200000  | 22.09840000 |
| H         | 5.59530000  | 1.44910000  | 21.04460000 |
| OTEXEX.   |             |             |             |
| C         | -5.07690000 | -1.52200000 | 3.68730000  |
| C         | -6.32680000 | -1.83220000 | 4.48930000  |
| C         | -5.53460000 | -2.59360000 | 6.59400000  |
| C         | -4.02420000 | -2.52190000 | 6.49850000  |
| H         | -4.86290000 | -2.16870000 | 3.02790000  |
| H         | -5.05760000 | -0.55810000 | 3.17590000  |
| H         | -7.00740000 | -2.13680000 | 3.57960000  |
| H         | -6.47290000 | -1.17200000 | 4.87150000  |
| H         | -5.56140000 | -3.38850000 | 7.17270000  |
| H         | -5.81860000 | -1.95340000 | 6.87660000  |
| H         | -3.66020000 | -2.36800000 | 7.44180000  |
| H         | -3.65410000 | -3.34870000 | 6.45940000  |
| I         | -1.98320000 | -3.41440000 | 3.63880000  |
| I         | -4.57190000 | 1.10310000  | 6.24480000  |
| O         | -6.17250000 | -2.92370000 | 5.37610000  |
| Te        | -3.32710000 | -1.21660000 | 4.94070000  |
| PEBHEN01. |             |             |             |
| Te        | 6.05020000  | -2.11270000 | -3.33190000 |
| I         | 4.44390000  | -4.14590000 | -4.12190000 |
| I         | 5.50390000  | -0.67250000 | -5.82480000 |
| I         | 6.75240000  | -3.37660000 | -0.83570000 |
| Cl        | 8.43530000  | -0.28240000 | -3.24610000 |
| C         | 8.10600000  | -4.09610000 | -4.63210000 |
| C         | 7.48120000  | -4.52600000 | -5.82610000 |
| H         | 6.97690000  | -3.92440000 | -6.32550000 |
| C         | 8.90860000  | -1.75320000 | -4.06810000 |
| C         | 10.25520000 | -1.77880000 | -4.56920000 |
| C         | 7.95630000  | -2.71560000 | -4.17040000 |
| C         | 8.82940000  | -5.01510000 | -3.87460000 |
| H         | 9.22850000  | -4.75410000 | -3.07670000 |
| C         | 8.94830000  | -6.32650000 | -4.32290000 |
| H         | 9.44800000  | -6.93360000 | -3.82700000 |
| C         | 7.61760000  | -5.83150000 | -6.25680000 |
| H         | 7.22780000  | -6.10320000 | -7.05660000 |
| C         | 8.34310000  | -6.74060000 | -5.48340000 |
| H         | 8.41660000  | -7.62700000 | -5.75510000 |
| C         | 10.59420000 | -2.53020000 | -5.68950000 |
| H         | 9.94500000  | -3.05690000 | -6.09650000 |
| C         | 11.27210000 | -1.00580000 | -3.97340000 |
| H         | 11.07930000 | -0.49520000 | -3.22150000 |
| C         | 11.89190000 | -2.50850000 | -6.21830000 |
| H         | 12.08620000 | -3.00350000 | -6.98190000 |
| C         | 12.87780000 | -1.76500000 | -5.61830000 |
| H         | 13.74620000 | -1.76980000 | -5.95150000 |
| C         | 12.54520000 | -0.99790000 | -4.49130000 |
| H         | 13.19860000 | -0.47610000 | -4.08350000 |
